# Supplementary material for: Metabolic models and gene essentiality data reveal essential and conserved metabolism in prokaryotes
Source: PubMed Central journal article supplement (PMC6283598; doi:10.1371/journal.pcbi.1006556), 2018-11-16
Supplement: pcbi.1006556.s002.pdf [file pcbi.1006556.s002.pdf]

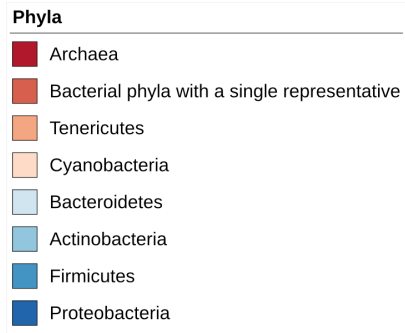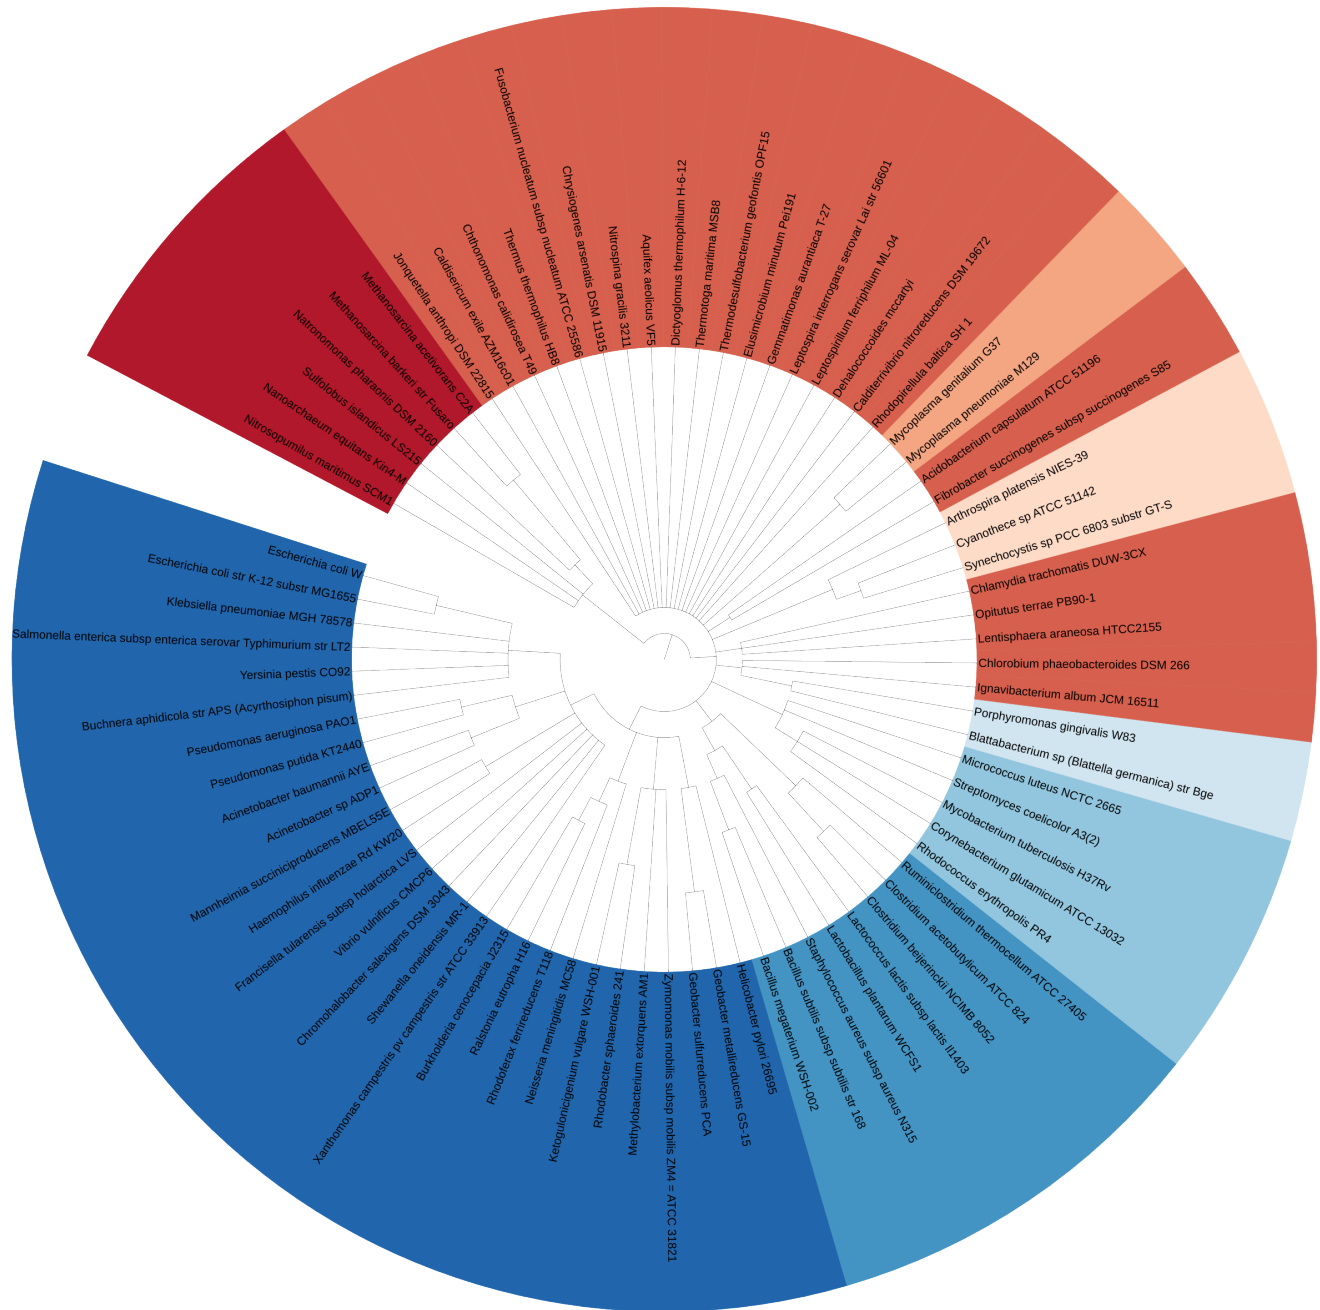

**S2 Figure. Phylogenetic reference tree for species used in the analysis of conservation of essential genes (based on NCBI taxonomy).**
