# Supplementary material for: Metabolic models and gene essentiality data reveal essential and conserved metabolism in prokaryotes
Source: PubMed Central journal article supplement (PMC6283598; doi:10.1371/journal.pcbi.1006556), 2018-11-16
Supplement: pcbi.1006556.s003.pdf [file pcbi.1006556.s003.pdf]

**S1 Table. Ubiquitous transporter genes.** The list includes genes conserved in all 79 prokaryotic genomes analysed. Essentiality is given as the number of datasets in DEG (out of 36) in which each gene is essential. The description is that of the corresponding annotated ORF in the genome of *E. coli* K12.

| Gene name | Description ( <i>E. coli</i> K12)                                   | Essentiality |
|-----------|---------------------------------------------------------------------|--------------|
| alsA      | D-allose ABC transporter ATPase                                     | 0            |
| araG      | L-arabinose ABC transporter ATPase                                  | 1            |
| artP      | arginine ABC transporter ATPase                                     | 1            |
| ccmA      | heme export ABC transporter ATPase                                  | 2            |
| cydC      | glutathione/cysteine ABC transporter export permease/ATPase         | 7            |
| cydD      | glutathione/cysteine ABC transporter export permease/ATPase         | 3            |
| cysA      | Sulfate/thiosulfate import ATP-binding protein                      | 0            |
| ddpD      | D,D-dipeptide ABC transporter ATPase                                | 0            |
| ddpF      | D,D-dipeptide ABC transporter ATPase                                | 0            |
| dppD      | dipeptide/heme ABC transporter ATPase                               | 3            |
| dppF      | dipeptide/heme ABC transporter ATPase                               | 1            |
| fecE      | Fe(3+) dicitrate transport ATP-binding protein                      | 0            |
| fepC      | Ferric enterobactin transport ATP-binding protein                   | 2            |
| fhuC      | iron(3+)-hydroxamate import ABC transporter ATPase                  | 0            |
| glnQ      | glutamine transporter subunit                                       | 0            |
| gltL      | glutamate/aspartate ABC transporter ATPase                          | 1            |
| gsiA      | glutathione ABC transporter ATPase                                  | 0            |
| hisP      | histidine ABC transporter ATPase                                    | 0            |
| livF      | branched-chain amino acid ABC transporter ATPase                    | 0            |
| livG      | branched-chain amino acid ABC transporter ATPase                    | 0            |
| malK      | maltose ABC transportor ATPase                                      | 0            |
| metN      | DL-methionine transporter subunit                                   | 0            |
| mgIA      | methyl-galactoside ABC transporter ATPase                           | 1            |
| modC      | Molybdenum import ATP-binding protein                               | 1            |
| nikD      | Nickel import ATP-binding protein                                   | 0            |
| nikE      | Nickel import ATP-binding protein                                   | 0            |
| potA      | spermidine/putrescine ABC transporter ATPase                        | 3            |
| potG      | putrescine ABC transporter ATPase                                   | 0            |
| proV      | glycine betaine/proline ABC transporter periplasmic binding protein | 0            |
| pstB      | Phosphate import ATP-binding protein                                | 2            |
| rbsA      | D-ribose ABC transporter ATPase                                     | 0            |
| sapD      | Peptide transport system ATP-binding protein                        | 2            |
| ssuB      | aliphatic sulfonate ABC transporter ATPase                          | 0            |
| tauB      | taurine ABC transporter ATPase                                      | 0            |
| thiQ      | thiamine/thiamine pyrophosphate ABC transporter ATPase              | 1            |
| ugpC      | sn-glycerol-3-phosphate ABC transporter ATPase                      | 2            |
| xylG      | D-xylose ABC transporter dual domain ATPase                         | 0            |
| ydcT      | putative ABC transporter ATPase                                     | 1            |
| yehX      | putative ABC transporter ATPase                                     | 0            |
| ytfR      | putative sugar ABC transporter ATPase                               | 0            |
| znuC      | Zinc import ATP-binding protein                                     | 0            |
