# Supplementary material for: Metabolic models and gene essentiality data reveal essential and conserved metabolism in prokaryotes
Source: PubMed Central journal article supplement (PMC6283598; doi:10.1371/journal.pcbi.1006556), 2018-11-16
Supplement: pcbi.1006556.s004.pdf [file pcbi.1006556.s004.pdf]

**S2 Table** – Highly conserved cofactor biosynthesis genes in prokaryotic genomes. Essentiality is given as the number of datasets in DEG (out of 36) in which each gene is essential. Conservation is given as the percentage of the 79 genomes where a significant homolog for this gene was found. The description is that of the corresponding annotated ORF in the genome of *E. coli* K12. Biosynthesized cofactors were manually retrieved from the detailed information available in the Metacyc database.

| Gene Name   | Conservation | Description                                                                                                         | Cofactor               | Essentiality (DEG) |
|-------------|--------------|---------------------------------------------------------------------------------------------------------------------|------------------------|--------------------|
| <b>gltX</b> | 100%         | Glutamate-tRNA ligase                                                                                               | Heme                   | 28                 |
| <b>sufC</b> | 100%         | Probable ATP-dependent transporter SufC                                                                             | FeS clusters           | 2                  |
| <b>sufS</b> | 98.7%        | cysteine desulfurase, stimulated by SufE; selenocysteine lyase, PLP-dependent                                       | FeS clusters           | 2                  |
| <b>iscS</b> | 97.5%        | cysteine desulfurase (tRNA sulfurtransferase), PLP-dependent                                                        | FeS clusters           | 10                 |
| <b>entA</b> | 97.5%        | 2,3-dihydro-2,3-dihydroxybenzoate dehydrogenase                                                                     | siderophores           | 0                  |
| <b>ispB</b> | 96.2%        | octaprenyl diphosphate synthase                                                                                     | quinones               | 12                 |
| <b>ispA</b> | 96.2%        | geranyltranstransferase                                                                                             | quinones               | 9                  |
| <b>ispU</b> | 96.2%        | undecaprenyl pyrophosphate synthase                                                                                 | quinones               | 2                  |
| <b>glyA</b> | 94.9%        | serine hydroxymethyltransferase                                                                                     | Folates                | 14                 |
| <b>hemL</b> | 94.9%        | glutamate-1-semialdehyde aminotransferase (aminomutase)                                                             | porphyrins             | 14                 |
| <b>bioA</b> | 94.9%        | 7,8-diaminopelargonic acid synthase, PLP-dependent                                                                  | Biotin                 | 3                  |
| <b>folD</b> | 94.9%        | Bifunctional protein FOLD                                                                                           | Folates                | 19                 |
| <b>dxs</b>  | 92.4%        | 1-deoxyxylulose-5-phosphate synthase, thiamine triphosphate-binding, FAD-requiring                                  | thiamine; isoprenoids; | 16                 |
| <b>nadK</b> | 92.4%        | NAD kinase                                                                                                          | nad/nadp               | 0                  |
| <b>pdxB</b> | 92.4%        | erythronate-4-phosphate dehydrogenase                                                                               | pyridoxal-5-p          | 2                  |
| <b>pabA</b> | 92.4%        | aminodeoxychorismate synthase, subunit II                                                                           | Folates                | 0                  |
| <b>epd</b>  | 92.4%        | D-erythrose 4-phosphate dehydrogenase                                                                               | pyridoxal-5-p          | 1                  |
| <b>gor</b>  | 91.1%        | glutathione oxidoreductase                                                                                          | glutathione            | 2                  |
| <b>ribB</b> | 91.1%        | 3,4-dihydroxy-2-butanone-4-phosphate synthase                                                                       | riboflavin             | 5                  |
| <b>ribF</b> | 91.1%        | bifunctional riboflavin kinase/FAD synthetase                                                                       | flavins                | 15                 |
| <b>ribD</b> | 89.9%        | fused diaminohydroxyphosphoribosylamino pyrimidine deaminase and 5-amino-6-(5-phosphoribosylamino) uracil reductase | riboflavin             | 8                  |
| <b>ribE</b> | 89.9%        | riboflavin synthase beta chain                                                                                      | riboflavin             | 7                  |
| <b>entC</b> | 89.9%        | isochorismate synthase 1                                                                                            | terpenoids             | 1                  |
| <b>ligA</b> | 89.9%        | DNA ligase, NAD(+)-dependent                                                                                        | ?                      | 23                 |
| <b>folC</b> | 88.6%        | bifunctional folylpolyglutamate synthase/ dihydrofolate synthase                                                    | Folates                | 9                  |
| <b>coaD</b> | 88.6%        | pantetheine-phosphate adenylyltransferase                                                                           | CoA                    | 22                 |
| <b>folP</b> | 88.6%        | 7,8-dihydropteroate synthase                                                                                        | folates                | 7                  |
| <b>ribC</b> | 88.6%        | riboflavin synthase, alpha subunit                                                                                  | riboflavin             | 3                  |
